# Supplementary material for: Anti-Inflammatory Activity and Mechanism of Isookanin, Isolated by Bioassay-Guided Fractionation from Bidens pilosa L
Source: PubMed Central journal article supplement (PMC7825412; doi:10.3390/molecules26020255), 2021-01-06

## SUPPLEMENTARY MATERIAL

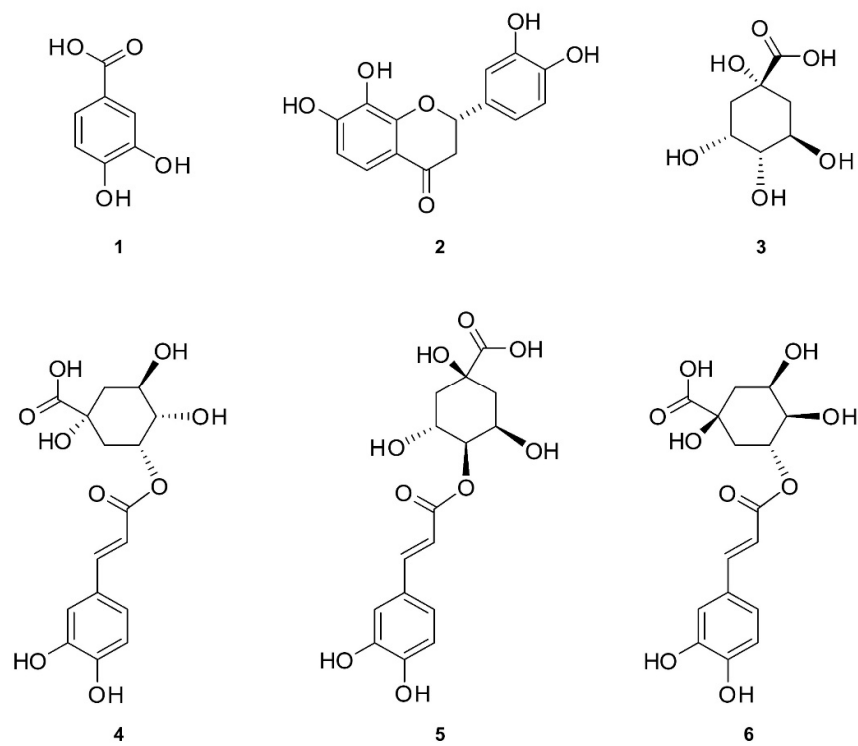

**Figure S1.** Chemical structures of compounds (1-6)

**A**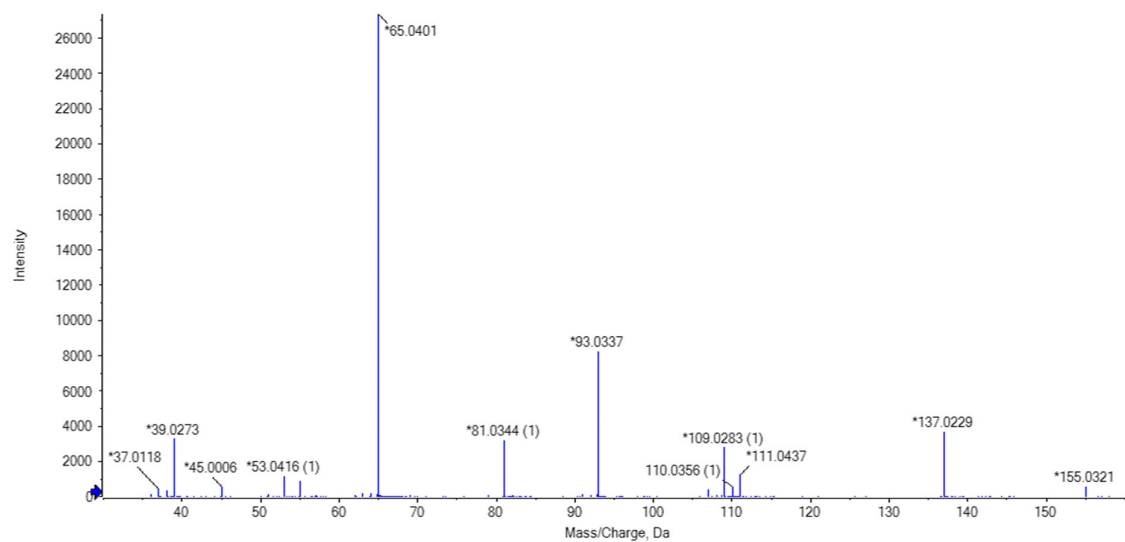**B**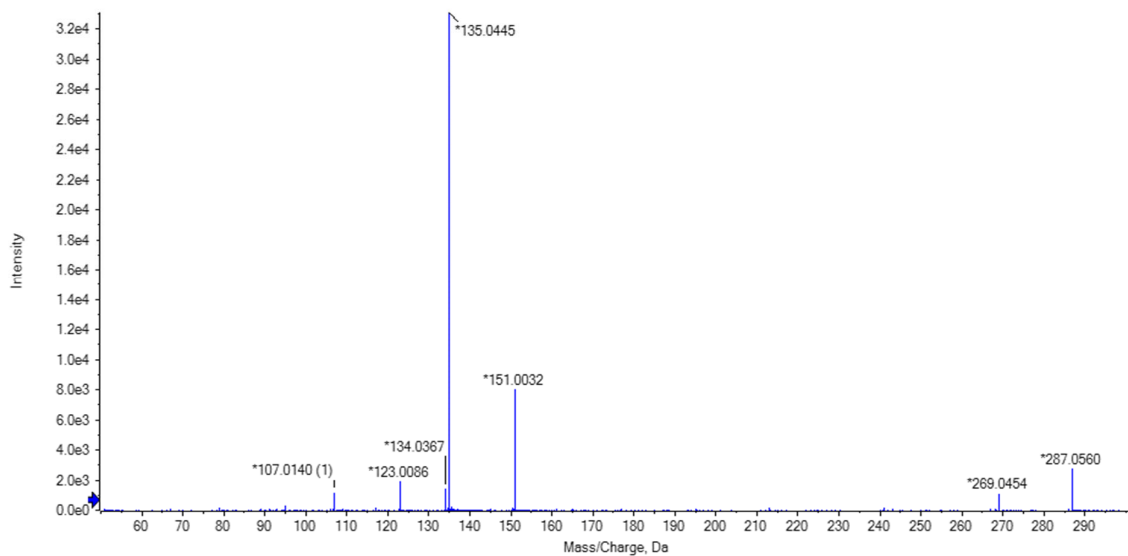

**Figure S2.** HR-ESI MS/MS spectra of compound 1 (A. protocatechuic acid) and compound 2 (B. isookanin).

**A**

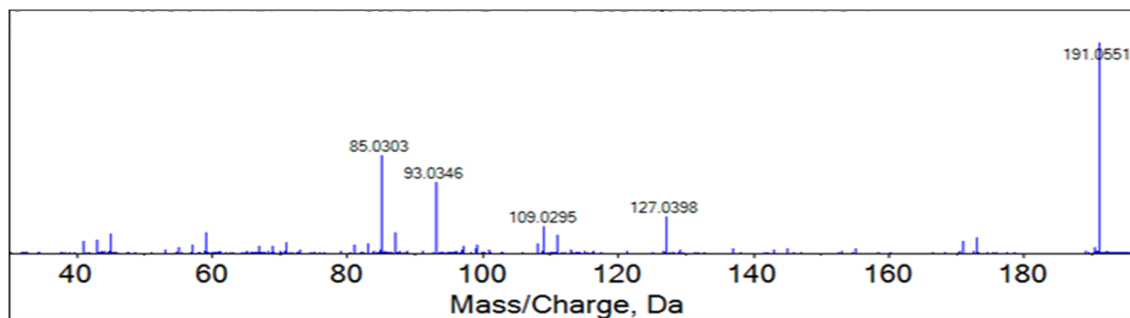

**B**

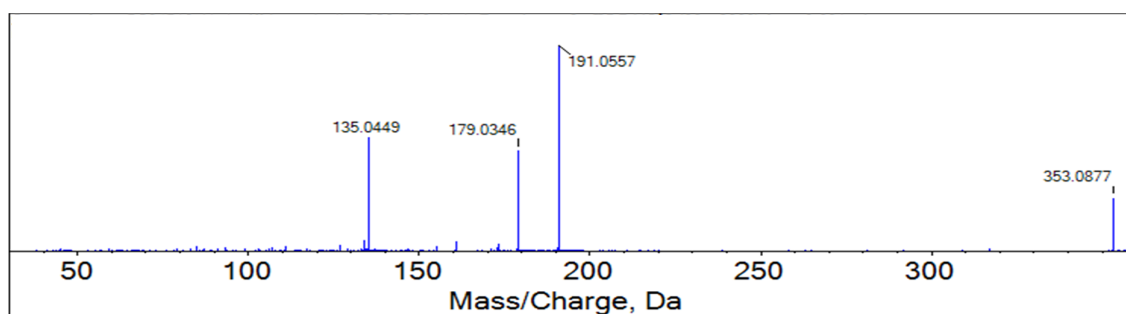

**C**

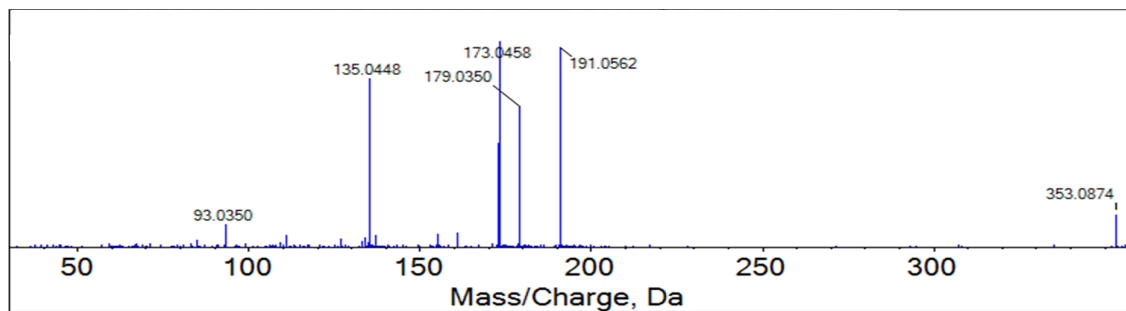

**D**

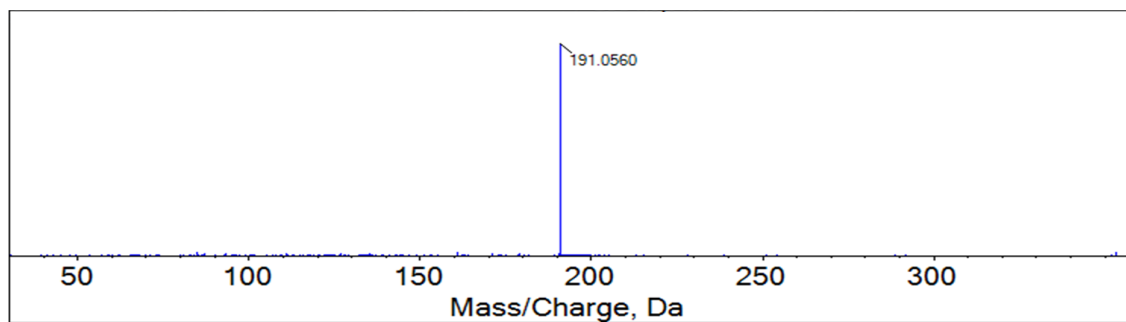

**Figure S3.** HR-ESI MS/MS spectra of compound 3 (A. (-)-quinic acid), compound 4 (B. 3-O-caffeoylquinic acid), compound 5 (C. 4-O-caffeoylquinic acid) and compound 6 (D. 5-O-caffeoylquinic acid).

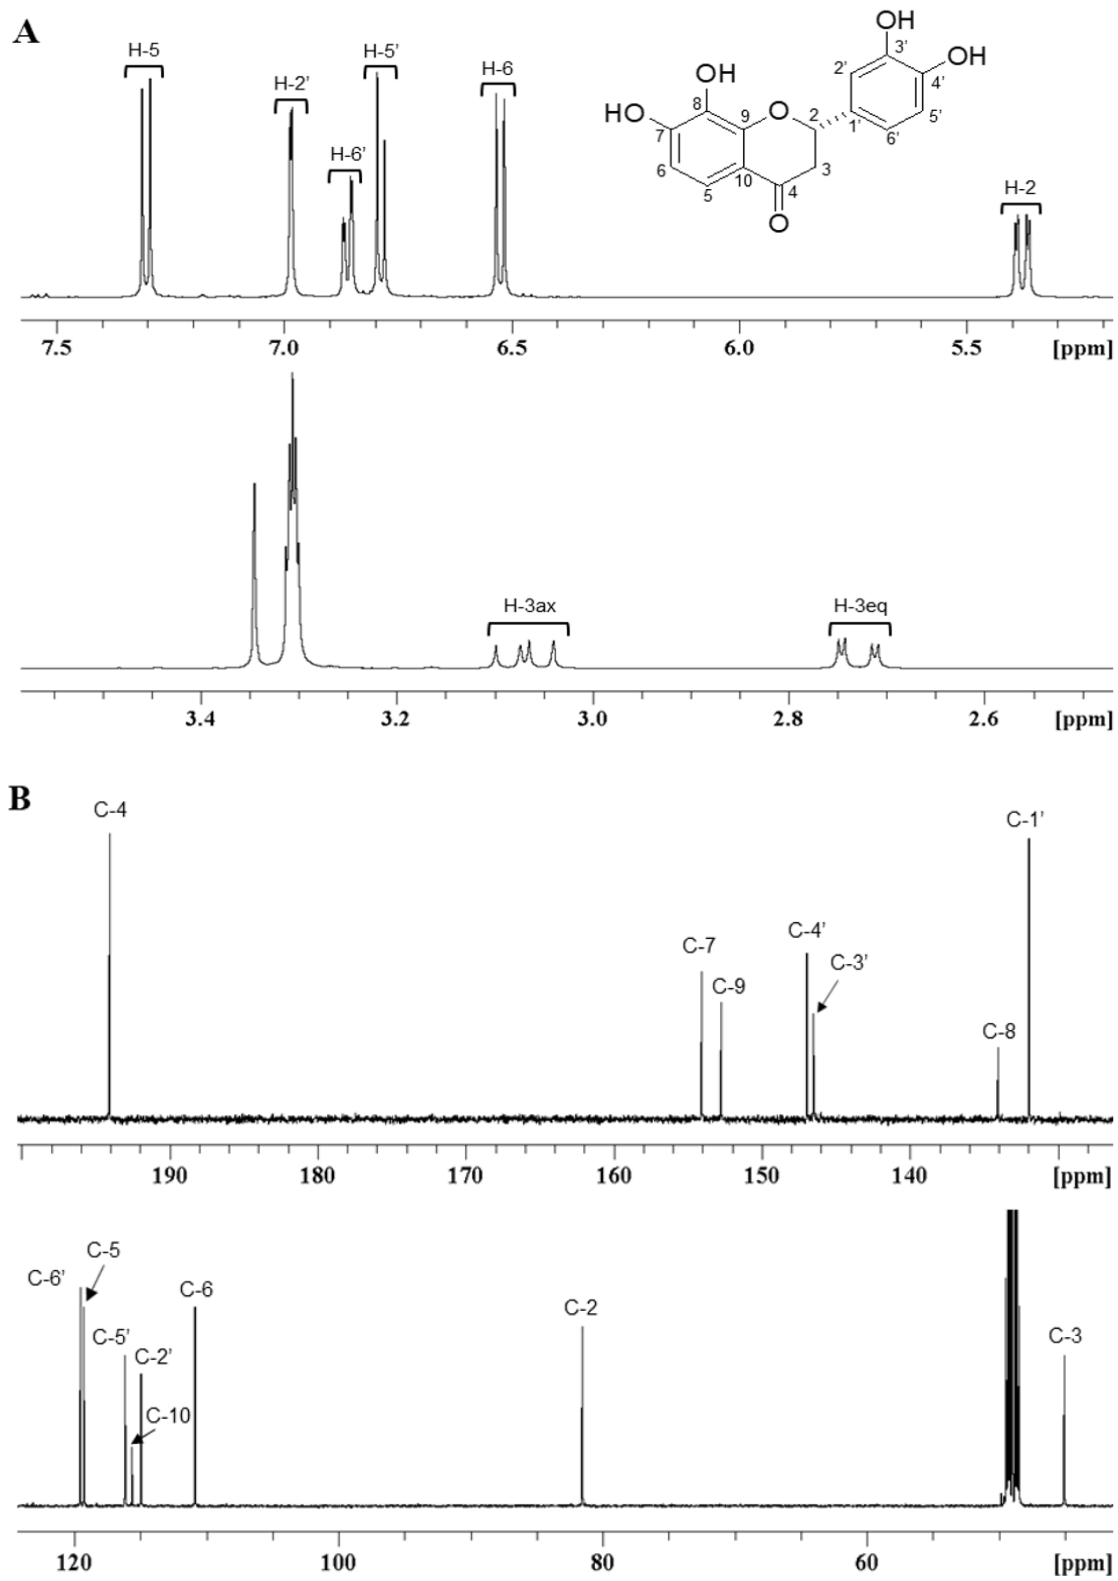

# Full length Western blot

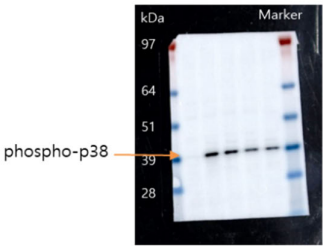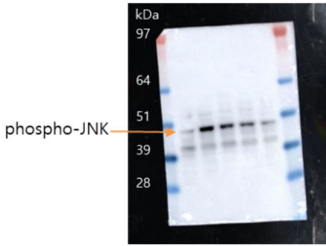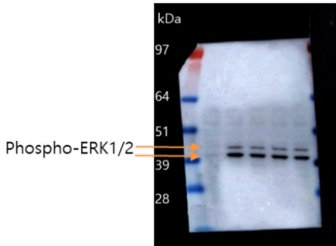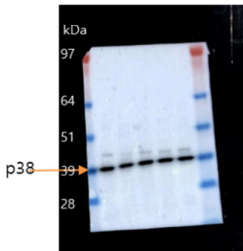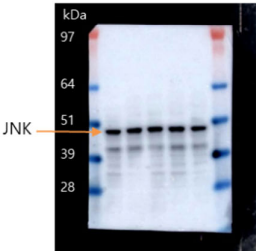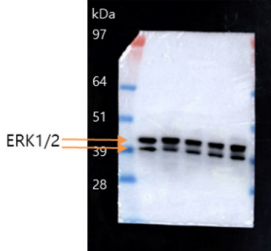

Supplement: molecules-26-00255-s001.pdf [file molecules-26-00255-s001.pdf]
